# Supplementary material for: Efficient Regeneration of Transgenic Rice from Embryogenic Callus via Agrobacterium-Mediated Transformation: A Case Study using GFP and Apple MdFT1 Genes
Source: Preprints.org preprint supplement (doi:10.20944/preprints202408.2172.v1), 2024-08-29
Supplement: Supplementary file 1 [file supplementary]

## Sheet: Table S1_WT(rep1)
	Sample name:		WT(rep1)
	Data file:		1-1_001.dx				Operator:			SYSTEM (SYSTEM)
	Instrument:		LA8080				Injection date:			2024-02-26 18:13:36+09:00
	Inj. volume:		20.0				Location:			2
	Acq. method:		#2622PH_Guard.amx				Type:			Sample
	Processing method:		*PH.pmx				Calib Level:
							Sample amount:			0
	Manually modified:		None
Signal:		VWD1E,VIS 1
RT [min]		Name	Peak Height	Area	Conc1 [umol/ml]			Conc2[ug/mL]			Peak Resolution JP
6.16		Asp	1024.89	16838.8	68.864			9165.75			1.207
6.813		Thr	471.009	7568.44	29.211			3479.08			1.569
7.487		Ser	624.02	10245.2	38.961			4094.78			1.629
8.453		Glu	1429.02	27004.1	105.347			15496.6			2.134
11.833		gly	481.99	12481.4	50.116			3762.2			4.56
13.34		Ala	581.646	20531.6	82.492			7349.18			1.942
15.133		Cys	54.914	705.727	3.749			900.936			2.953
15.66		Val	846.787	12498.4	459.13			53764.1			1.494
16.847		Met	165.425	3308.07	13.299			1984.16			0.826
19.207		Ile	260.841	7543.03	30.539			4006.65			1.24
20.253		Leu	465.767	15372.6	64.598			8475.22			1.256
21.12		Tyr	150.066	2835.04	12.288			2226.55			1.261
22.033		Phe	368.164	7627.67	31.729			5241.68			1.135
24.287		Lys	611.787	8260.14	29.843			4363.07			1.338
25.5		NH3	970.795	24822.8	116.426			1982.74			1.086
26.547		His	208.406	3852.4	15.113			2345.54			1.817
30.453		Arg	349.378	9905.6	41.268			7188.82			1.136
Signal:		VWD1F,VIS 2
RT [min]		Name	Peak Height	Area	Conc1 [umol/ml]			Conc2[ug/mL]			Peak Resolution JP
9.14		Pro	97.137	1321.98	27.136			3123.32

## Sheet: Table S2_WT(rep2)
	Sample name:		WT(rep2)
	Data file:		1-2_007.dx				Operator:			SYSTEM (SYSTEM)
	Instrument:		LA8080				Injection date:			2024-02-26 23:58:09+09:00
	Inj. volume:		20.0				Location:			2
	Acq. method:		#2622PH_Guard.amx				Type:			Sample
	Processing method:		*PH.pmx				Calib Level:
							Sample amount:			0
	Manually modified:		None
Signal:		VWD1E,VIS 1
RT [min]		Name	Peak Height	Area	Conc1 [umol/ml]			Conc2[ug/mL]			Peak Resolution JP
6.193		Asp	999.076	16394.6	67.047			8923.94			1.208
6.847		Thr	456.596	7325.12	28.272			3367.23			1.574
7.52		Ser	611.414	9933.09	37.774			3970.05			1.642
8.487		Glu	1410.13	26220.3	102.289			15046.8			2.167
11.88		gly	466.882	11965.6	48.045			3606.72			4.619
13.387		Ala	567.961	19499.4	78.345			6979.72			1.981
15.167		Cys	51.231	675.036	3.586			861.754			2.973
15.7		Val	811.082	11995.7	440.665			51601.9			1.495
16.887		Met	158.304	3155.18	12.684			1892.46			0.818
19.247		Ile	251.082	7217.86	29.222			3833.93			1.238
20.3		Leu	460.288	14808.7	62.228			8164.32			1.287
21.14		Tyr	148.064	2754.53	11.939			2163.32			1.256
22.053		Phe	356.521	7409.04	30.82			5091.44			1.164
24.307		Lys	579.962	8023.99	28.99			4238.34			1.305
25.547		NH3	906.051	23057.5	108.147			1841.74			1.069
26.587		His	200.958	3733.61	14.647			2273.22			1.802
30.5		Arg	342.909	9609.7	40.035			6974.08			1.169
Signal:		VWD1F,VIS 2
RT [min]		Name	Peak Height	Area	Conc1 [umol/ml]			Conc2[ug/mL]			Peak Resolution JP
9.173		Pro	117.81	1754.99	36.024			4146.34

## Sheet: Table S3_MdFT1(rep1)
	Sample name:		MdFT1(rep1)
	Data file:		3-1_003.dx				Operator:			SYSTEM (SYSTEM)
	Instrument:		LA8080				Injection date:			2024-02-26 20:08:24+09:00
	Inj. volume:		20.0				Location:			4
	Acq. method:		#2622PH_Guard.amx				Type:			Sample
	Processing method:		*PH.pmx				Calib Level:
							Sample amount:			0
	Manually modified:		None
Signal:		VWD1E,VIS 1
RT [min]		Name	Peak Height	Area	Conc1 [umol/ml]			Conc2[ug/mL]			Peak Resolution JP
6.18		Asp	1154.66	19712.2	80.615			10729.8			1.262
6.827		Thr	563.366	8988.33	34.692			4131.78			1.525
7.5		Ser	715.175	11735.1	44.627			4690.26			1.638
8.467		Glu	1535.75	30400.8	118.598			17445.8			2.072
11.873		gly	623.215	16359.4	65.687			4931.13			4.585
13.367		Ala	635.771	22150.3	88.995			7928.58			1.933
15.127		Cys	86.266	1067.39	5.671			1362.63			2.945
15.653		Val	938.015	13931.4	511.772			59928.5			1.5
16.82		Met	190.605	3800.66	15.279			2279.62			0.835
19.173		Ile	292.765	8454.92	34.23			4491.02			1.223
20.207		Leu	505.205	17248.8	72.481			9509.56			1.217
21.127		Tyr	172.374	3405.23	14.759			2674.36			1.297
22.033		Phe	422.17	8671.98	36.073			5959.32			1.153
24.3		Lys	755.988	10456.9	37.78			5523.42			1.302
25.513		NH3	993.778	25635.6	120.239			2047.66			1.118
26.547		His	250.151	4625.45	18.146			2816.22			1.777
30.44		Arg	382.419	10743	44.756			7796.57			1.141
Signal:		VWD1F,VIS 2
RT [min]		Name	Peak Height	Area	Conc1 [umol/ml]			Conc2[ug/mL]			Peak Resolution JP
9.153		Pro	122.109	1691.64	34.724			3996.68

## Sheet: Table S4_MdFT1(rep2)
	Sample name:		MdFT1(rep1)
	Data file:		3-2_009.dx				Operator:			SYSTEM (SYSTEM)
	Instrument:		LA8080				Injection date:			2024-02-27 01:52:56+09:00
	Inj. volume:		20.0				Location:			4
	Acq. method:		#2622PH_Guard.amx				Type:			Sample
	Processing method:		*PH.pmx				Calib Level:
							Sample amount:			0
	Manually modified:		None
Signal:		VWD1E,VIS 1
RT [min]		Name	Peak Height	Area	Conc1 [umol/ml]			Conc2[ug/mL]			Peak Resolution JP
6.22		Asp	1151.8	19664.8	80.421			10704			1.282
6.853		Thr	563.592	8962.39	34.592			4119.85			1.494
7.533		Ser	721.065	11702.4	44.503			4677.22			1.665
8.507		Glu	1536.32	30157.9	117.65			17306.4			2.102
11.913		gly	626.572	16202.3	65.056			4883.75			4.744
13.413		Ala	644.847	21982.3	88.32			7868.47			1.97
15.167		Cys	82.989	1059.29	5.628			1352.3			2.955
15.7		Val	926.69	13820.4	507.696			59451.2			1.497
16.887		Met	189.579	3770.62	15.158			2261.6			0.827
19.24		Ile	292.154	8404.16	34.025			4464.06			1.221
20.273		Leu	523.457	17188.4	72.228			9476.28			1.247
21.14		Tyr	183.248	3443.69	14.926			2704.57			1.265
22.053		Phe	419.246	8689.18	36.145			5971.14			1.179
24.307		Lys	743.285	10430.4	37.684			5509.41			1.316
25.547		NH3	970.432	24869.3	116.644			1986.46			1.092
26.58		His	249.926	4624.01	18.14			2815.34			1.781
30.48		Arg	385.924	10762.3	44.837			7810.57			1.196
Signal:		VWD1F,VIS 2
RT [min]		Name	Peak Height	Area	Conc1 [umol/ml]			Conc2[ug/mL]			Peak Resolution JP
9.187		Pro	147.196	2250.28	46.19			5316.51
