# Supplementary material for: Efficient Regeneration of Transgenic Rice from Embryogenic Callus via Agrobacterium-Mediated Transformation: A Case Study using GFP and Apple MdFT1 Genes
Source: Preprints.org preprint supplement (doi:10.20944/preprints202408.2172.v1), 2024-08-29

## Original images (gels) of genomic DNA, genomic DNA PCR, and RT-PCR

**Figure 3a.** Genomic DNA and gDNA PCR of Ramy3D::MdFT1 transgenic callus lines

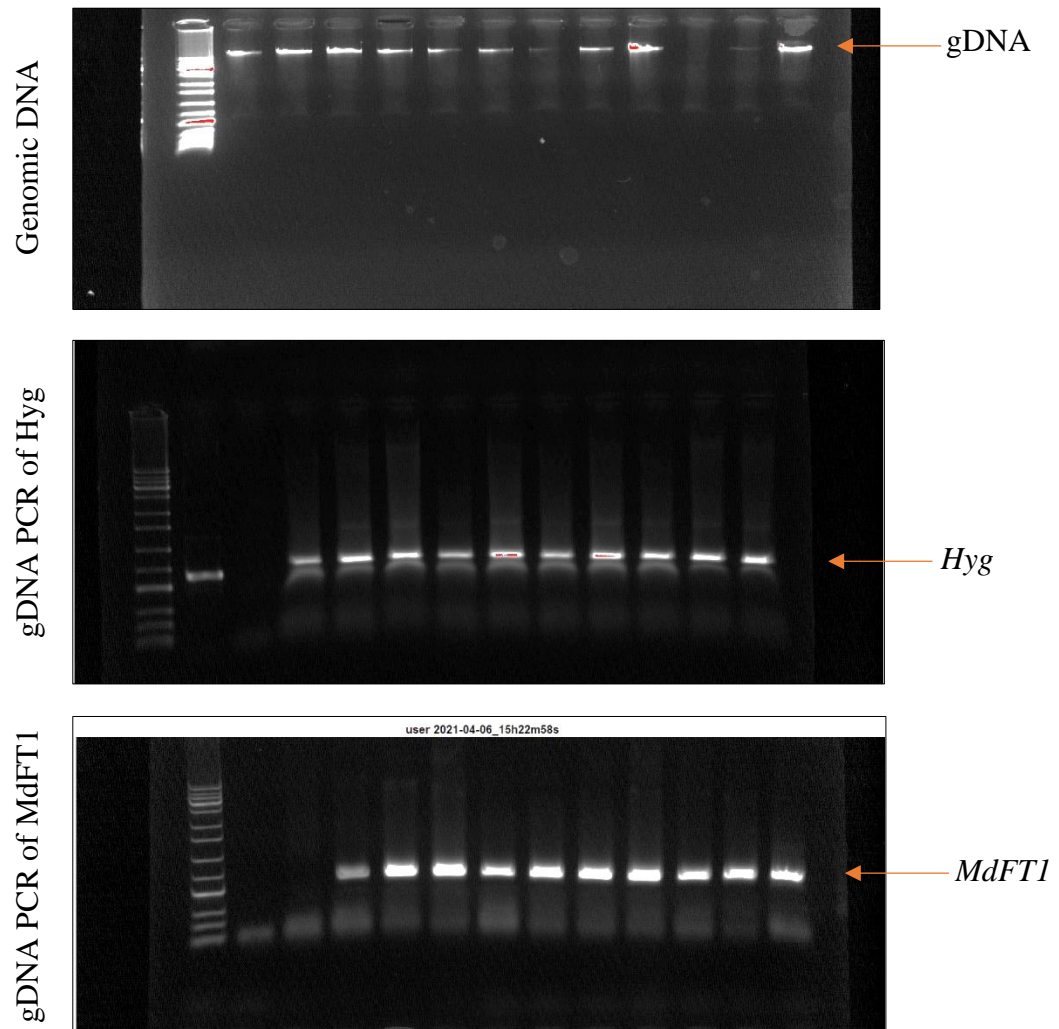

**Figure 3b.** Genomic DNA and gDNA PCR of Ubi::Cas9–eGFP transgenic callus lines

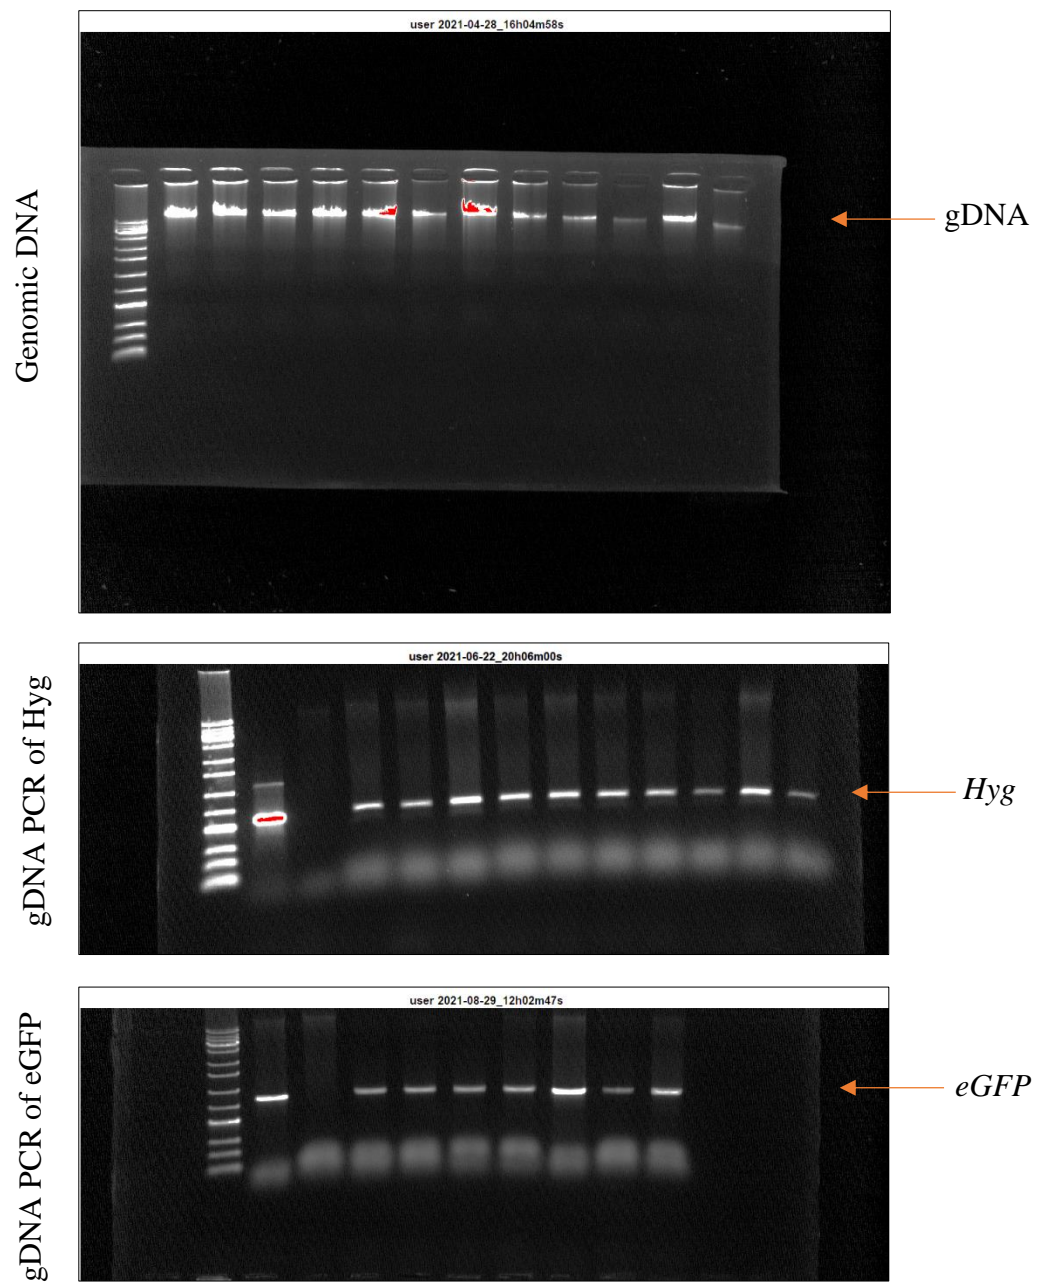

**Figure 3c.** RT-PCR of Ramy3D::MdFT1 transgenic callus lines

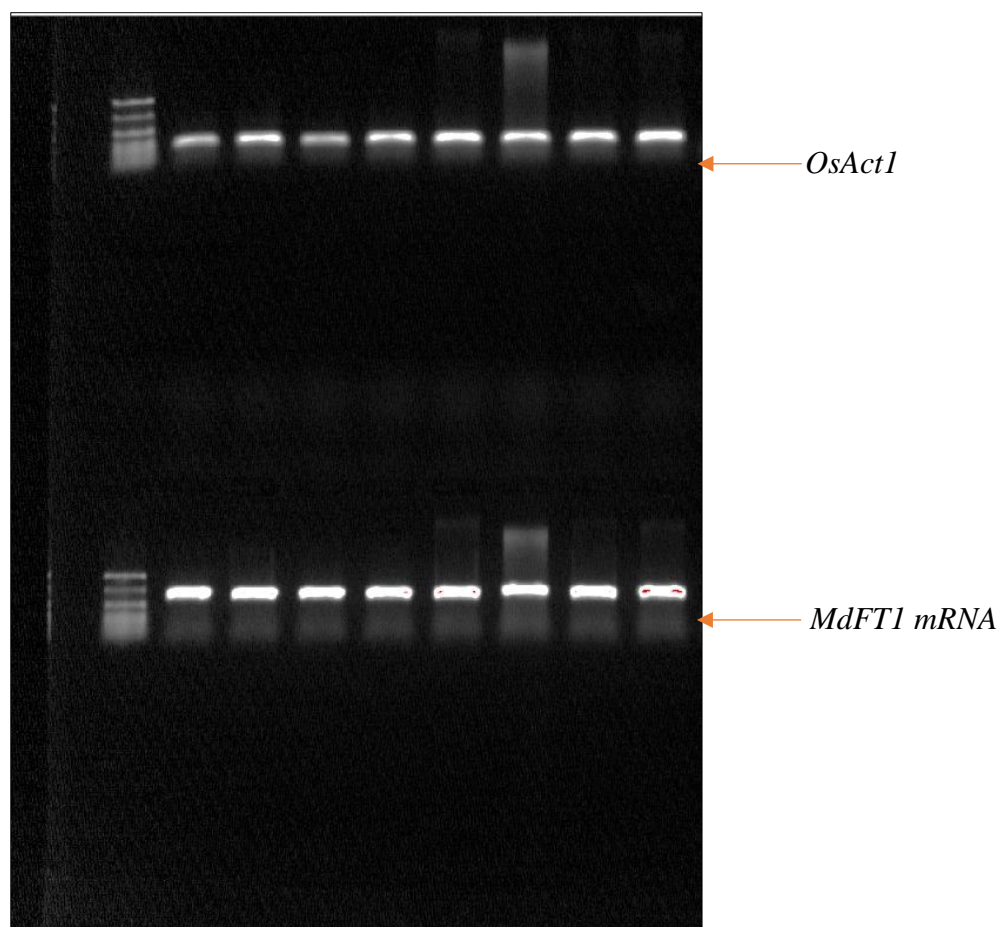

**Figure 4c.** Genomic DNA and gDNA PCR of Ramy3D::MdFT1 transgenic plants

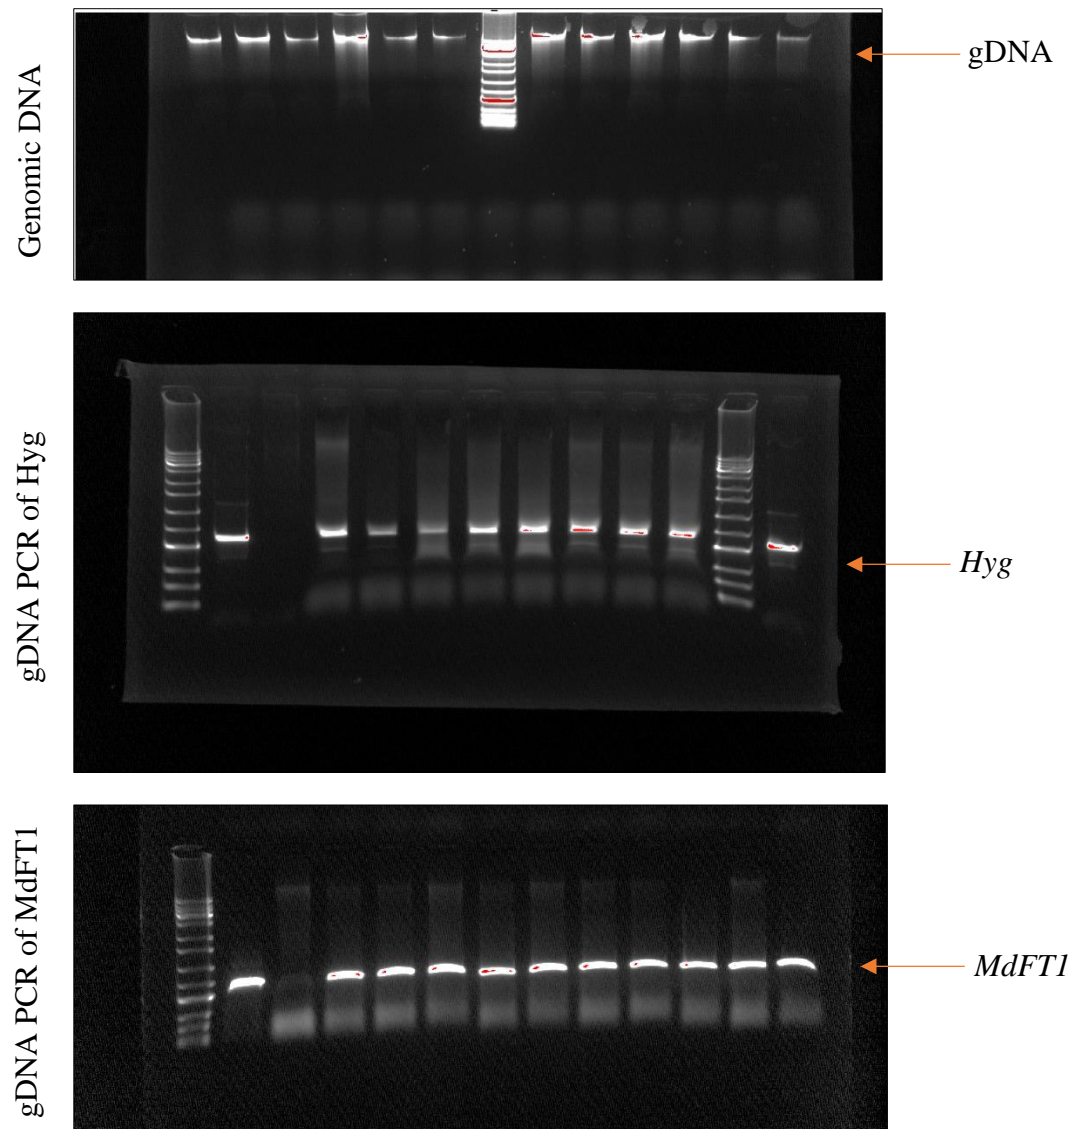

**Figure 4d.** Genomic DNA and gDNA PCR of Ubi::Cas9–eGFP transgenic plants

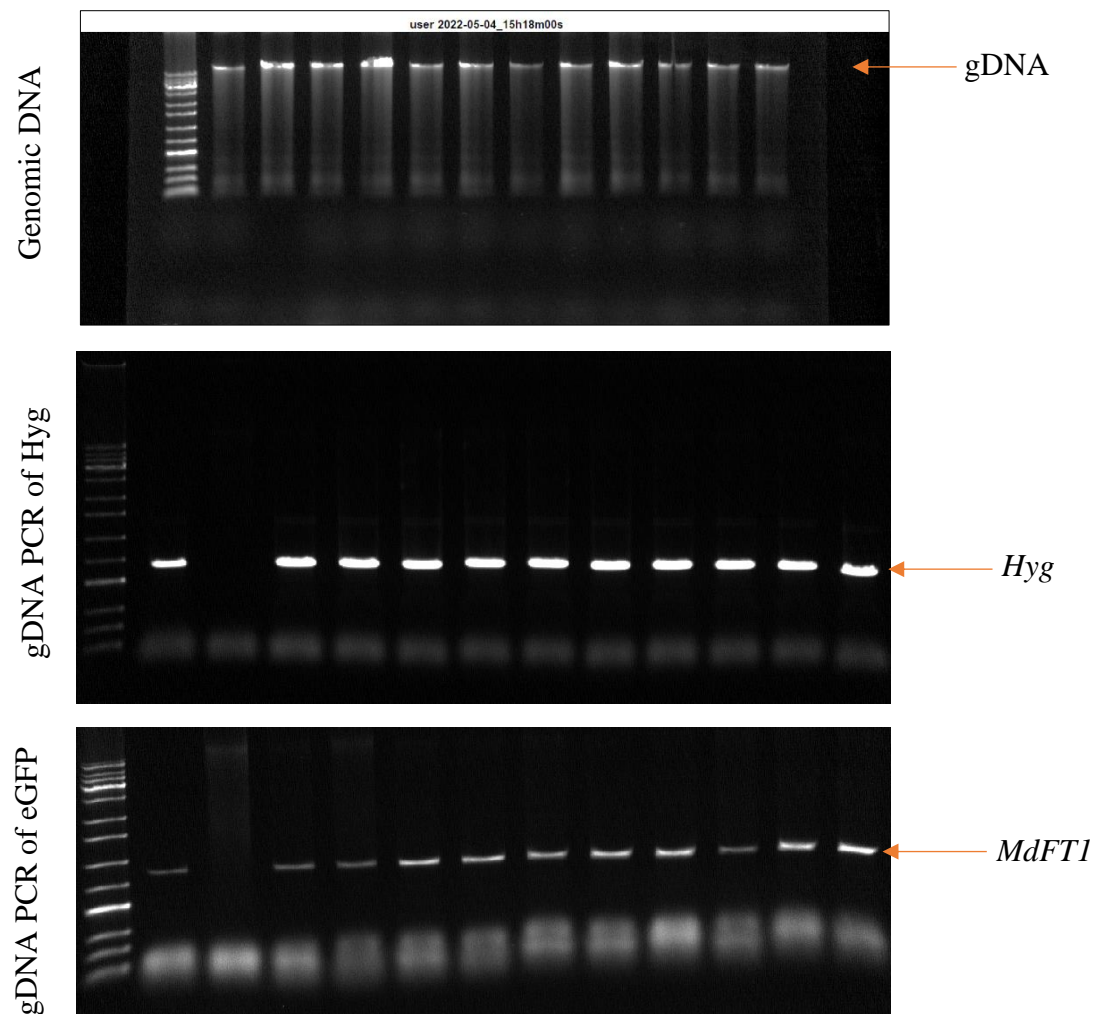

Supplement: Supplementary file 1 [file supplementary]
