# Supplementary material for: Efficient Regeneration of Transgenic Rice from Embryogenic Callus via Agrobacterium-Mediated Transformation: A Case Study using GFP and Apple MdFT1 Genes
Source: Preprints.org preprint supplement (doi:10.20944/preprints202408.2172.v1), 2024-08-29
Supplement: Supplementary file 2 [file supplementary]

## Article

# Efficient Regeneration of Transgenic Rice from Embryogenic Callus via *Agrobacterium*-Mediated Transformation: A Case Study using *GFP* and Apple *MdFT1* Genes

Van Giap Do<sup>1,\*</sup>, Seonae Kim<sup>1</sup>, Nay Myo Win<sup>1</sup>, Soon-Il Kwon<sup>1</sup>, Hunjoong Kweon<sup>1</sup>, Sangjin Yang<sup>1</sup>, Juhyeon Park<sup>1</sup>, Gyungran Do<sup>2</sup> and Youngsuk Lee<sup>1,\*</sup>

<sup>1</sup> Apple Research Center, National Institute of Horticultural and Herbal Science, Rural Development Administration, Daegu 43100, Republic of Korea; [seonaekim@korea.kr](mailto:seonaekim@korea.kr) (S.K.); [naymyowin@korea.kr](mailto:naymyowin@korea.kr) (N.M.W.); [topapple@korea.kr](mailto:topapple@korea.kr) (S.-I.K.); [kweonhj@korea.kr](mailto:kweonhj@korea.kr) (H.K.); [yangsangjin@korea.kr](mailto:yangsangjin@korea.kr) (S.Y.); [wngus1113@korea.kr](mailto:wngus1113@korea.kr) (J.P.)

<sup>2</sup> Planning and Coordination Division, National Institute of Horticultural and Herbal Science, Rural Development Administration, Wanju-gun 55365, Republic of Korea; [microdo@korea.kr](mailto:microdo@korea.kr) (G.D.)

\* Correspondence: [kongfo@korea.kr](mailto:kongfo@korea.kr) (Y.L.); [giapbio@korea.kr](mailto:giapbio@korea.kr) (V.G.D.)

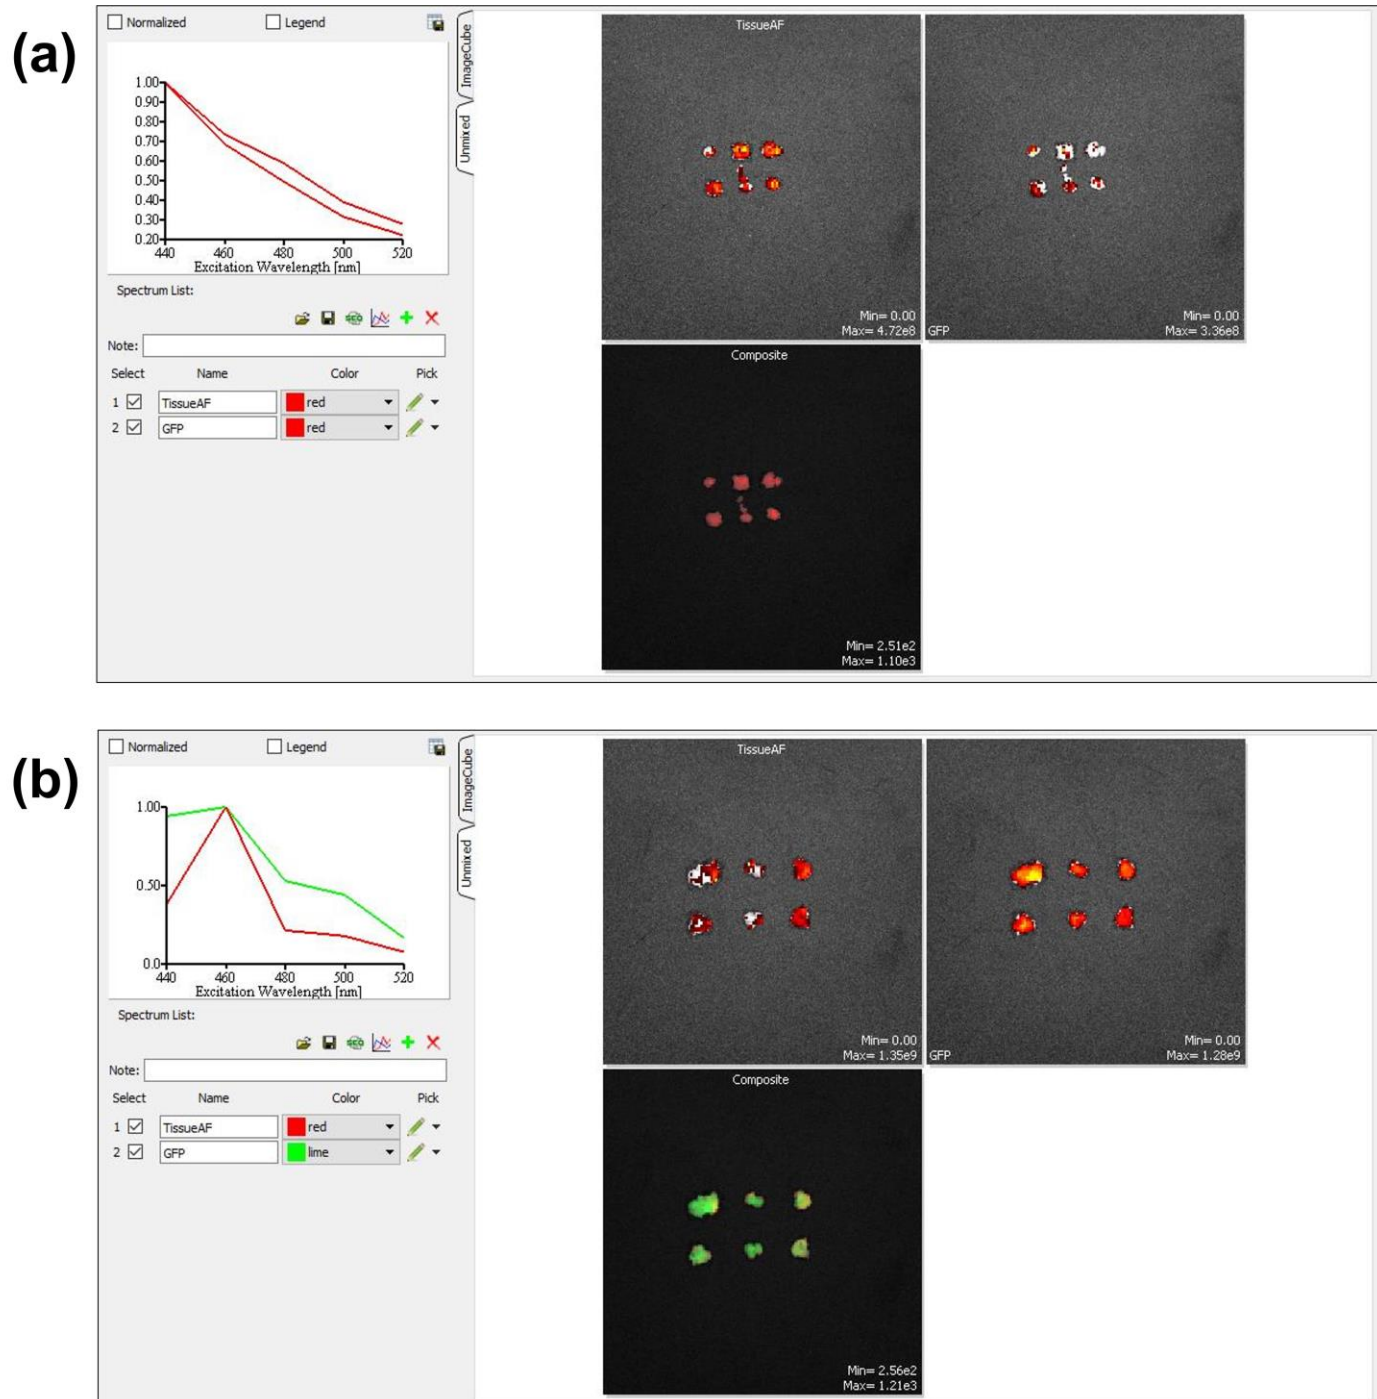

**Figure S1.** Observation of green fluorescent protein (eGFP) in rice calli of wildtype (a) and transgenic Ubi::Cas9-eGFP lines (b).

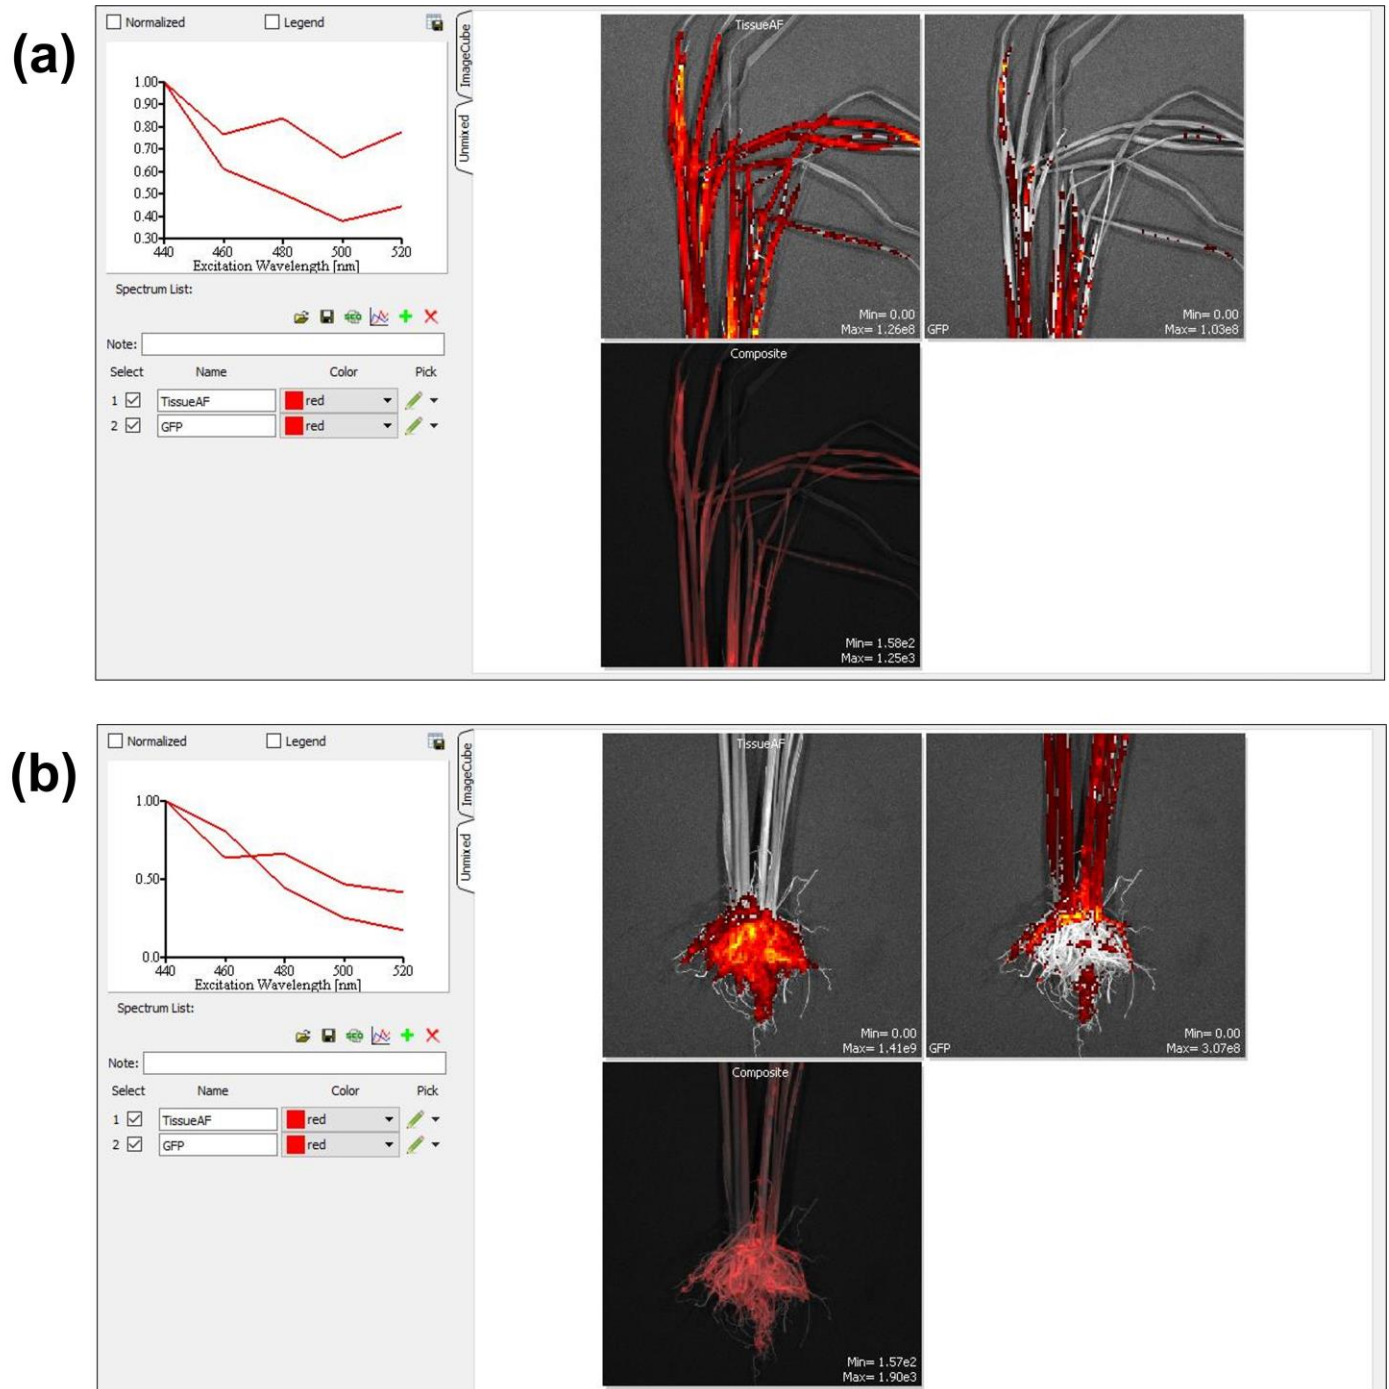

**Figure S2.** Observation of green fluorescent protein (eGFP) in different organs, including leaves (a), stems and roots (b) in wildtype rice plants (T1 seedlings).

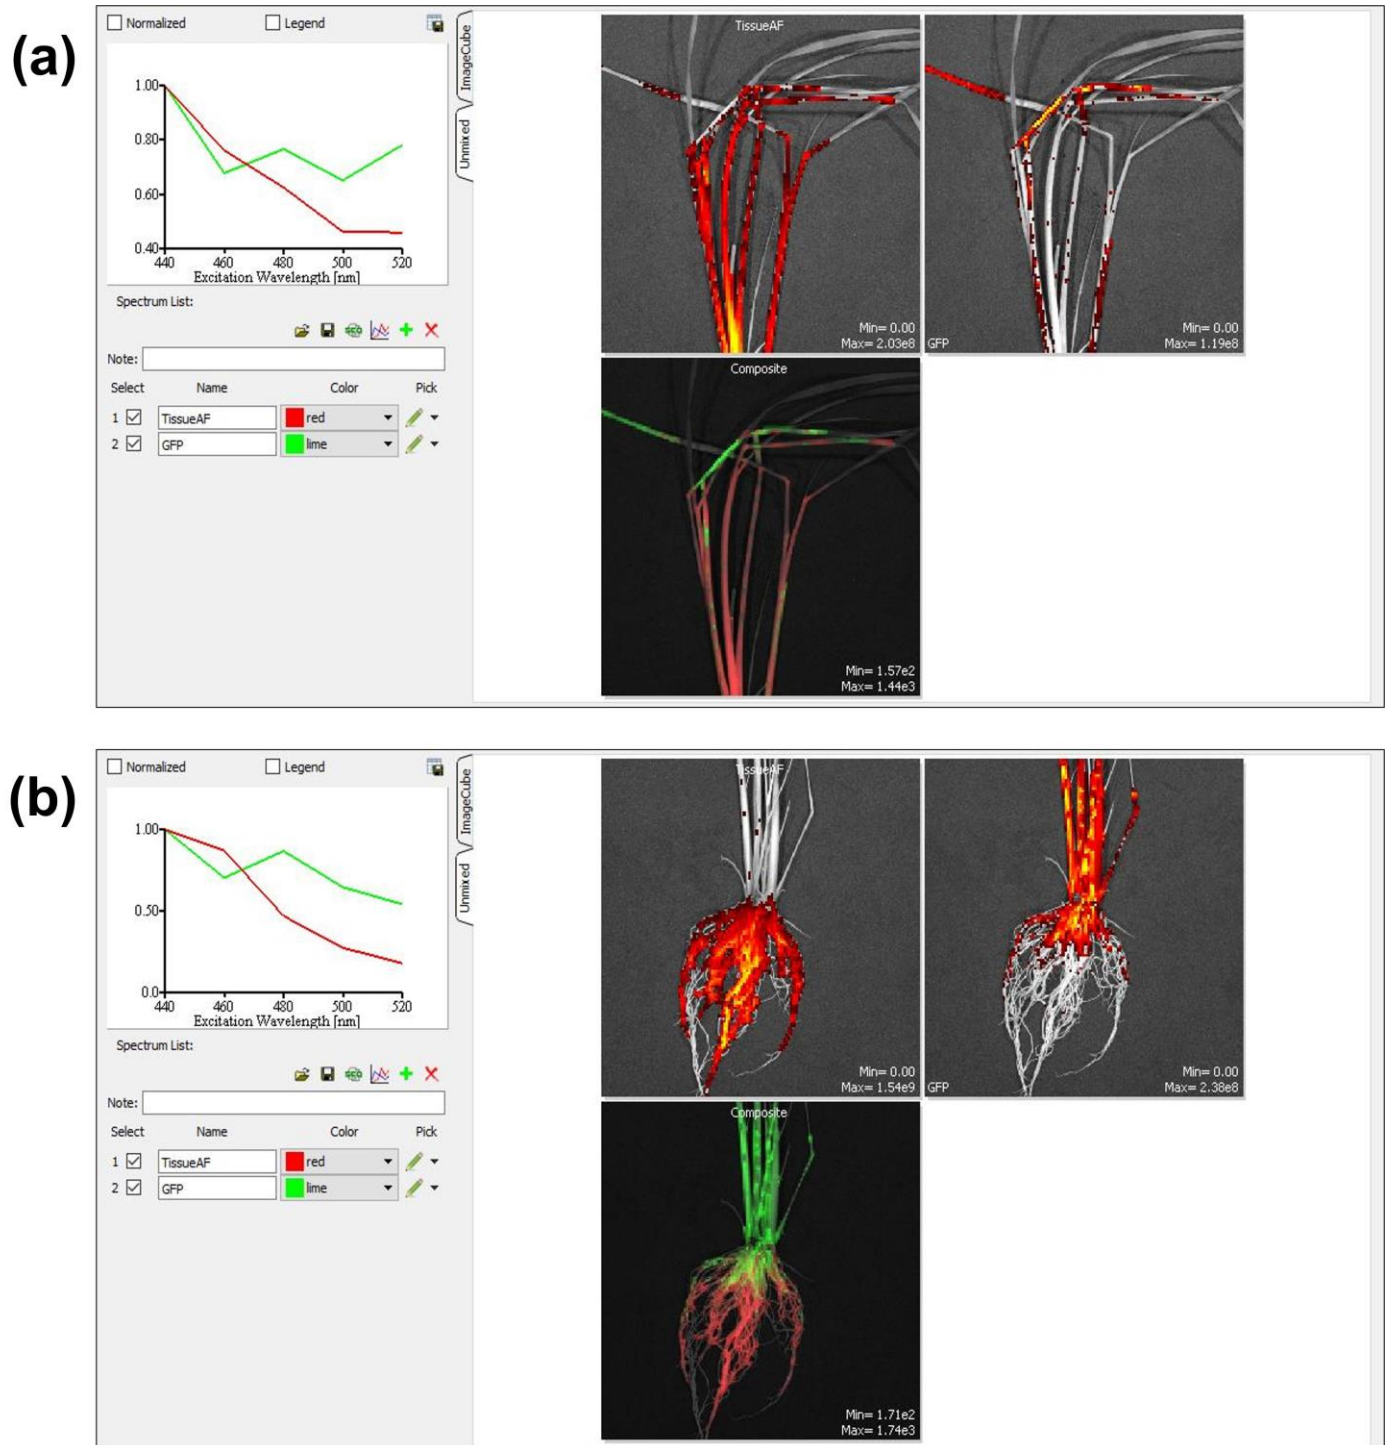

**Figure S3.** Observation of green fluorescent protein (eGFP) in rice plants (T1 seedlings) of transgenic Ubi::Cas9-eGFP lines in different organs including leaf (a), stem and root (b).
